# Supplementary material for: Detection of avian influenza virus based on magnetic silicananoparticles resonance light scattering system
Source: Royal Society of Chemistry journal article supplement (doi:10.1039/c1an16041a), 2011-12-05
Supplement: c1an16041a.pdf [file c1an16041a.pdf]

## Supporting Information

### Detection of avian influenza virus based on magnetic silica nanoparticles resonance light scattering system

Zou Xin, Huang Hui, Gao Yuan, Su Xingguang\*

Department of Analytical Chemistry, College of Chemistry, Jilin University, Qianwei

Road 10, Changchun, 130012, China

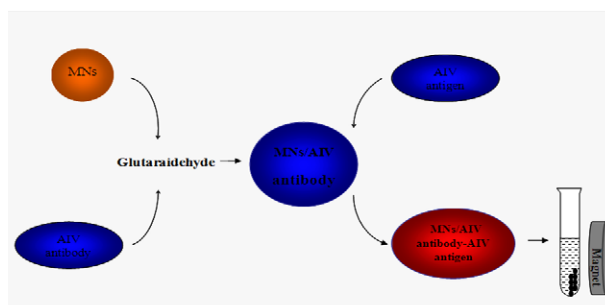

**Scheme 1** Schematic illustration of the immunoreaction of AIV antigen and AIV antibody on the surface of MNs

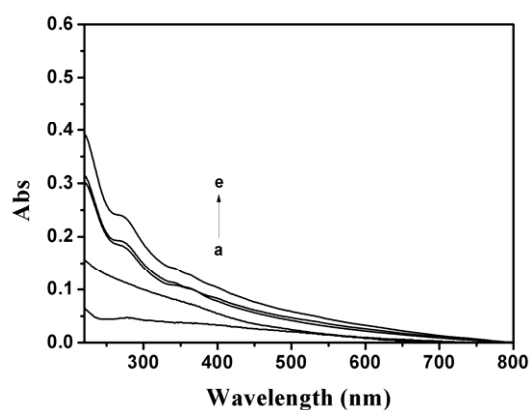

**Fig. S1** UV-vis spectrum of AIV antibody (a) MNs (b) and MNs/AIV antibody (c-e). c-e represents MNs/AIV antibody is washed and separated thrice, twice and once, respectively. The concentration of AIV antibody is 200 ng/mL.

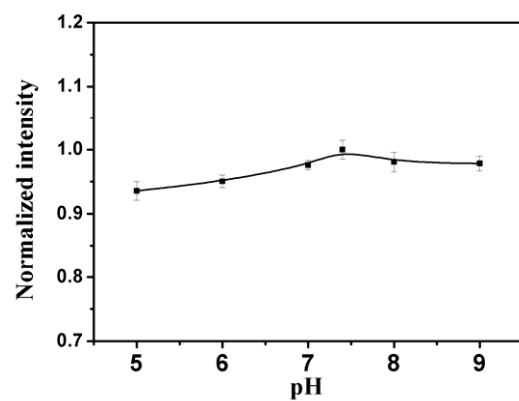

**Fig. S2** The effect of immunoreaction pH on the RLS intensity of MNs/AIV antibody-AIV antigen immunoreaction system at 545 nm. Conditions: the concentration of AIV antibody is 200 ng/mL; the immunoreaction time is 90 min; the concentration of AIV antigen is 200 ng/mL. Error bars are calculated from 3 measurements on 3 independent samples.
